# Supplementary material
Source: publisher figshare collection journal article supplement (https://frontiersin.figshare.com/ndownloader/files/27526049)
Supplement: Supplementary file [file 27526049]

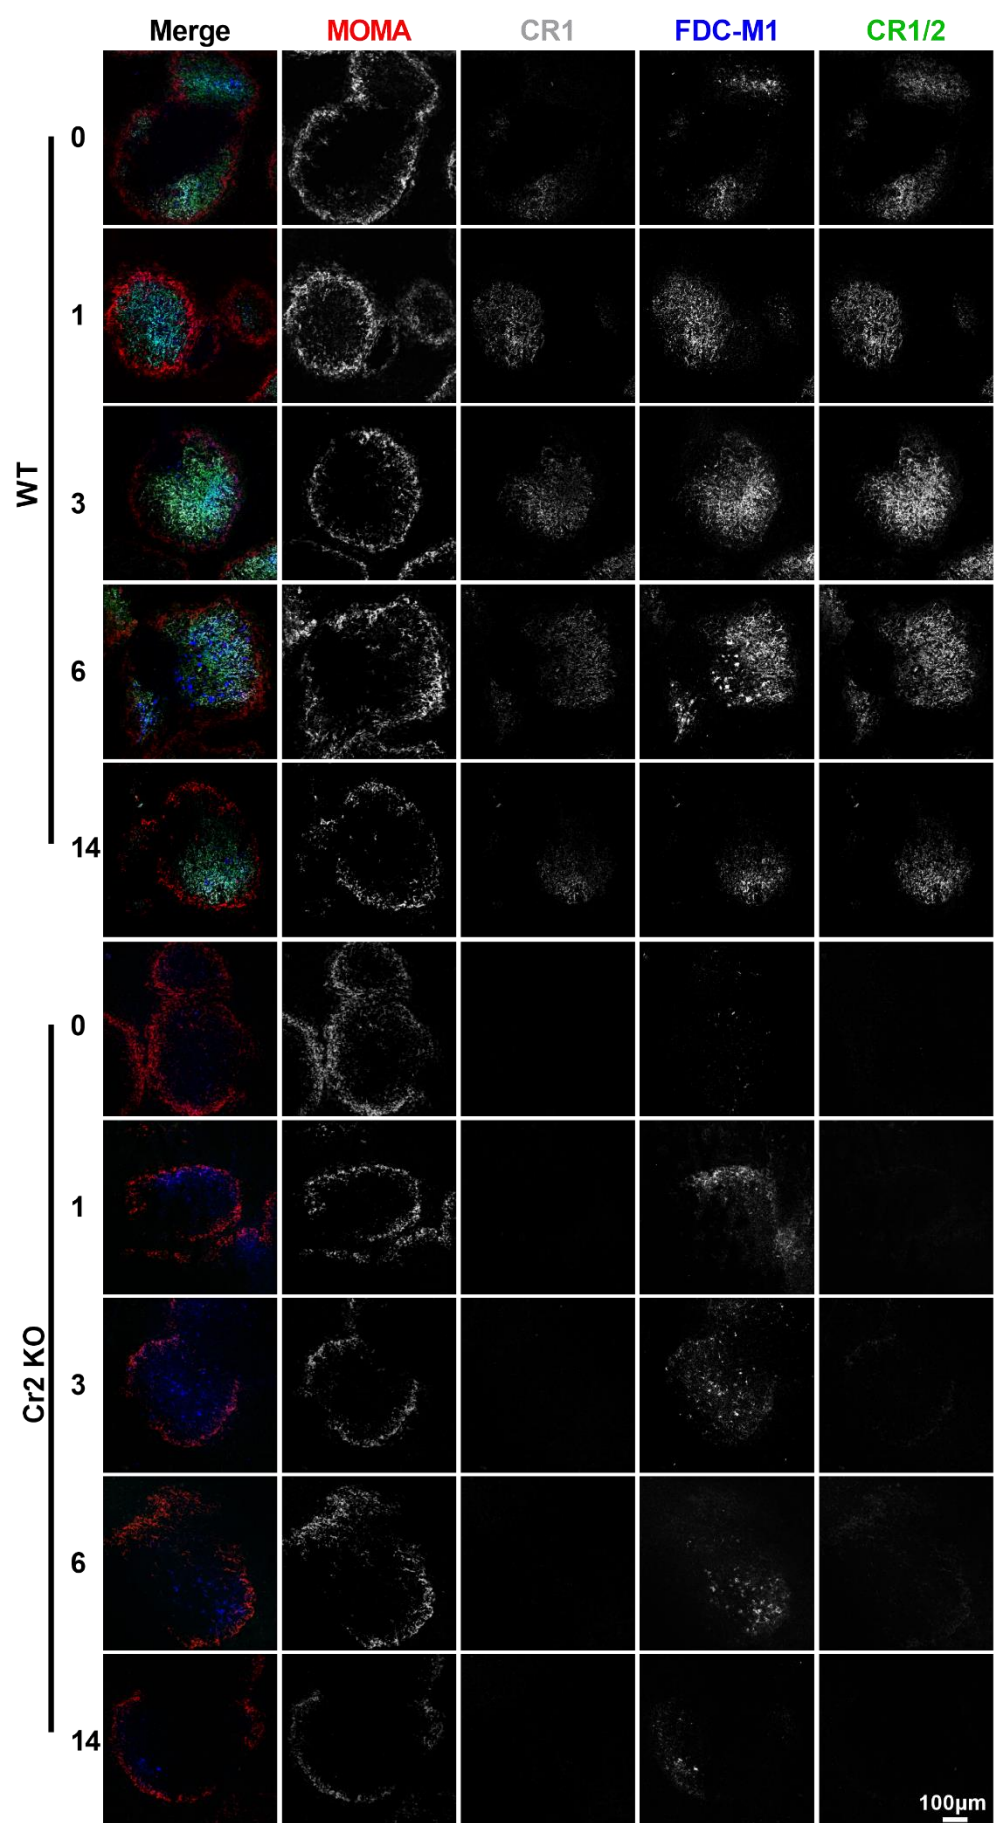

**Supplementary Figure 5. Expanded representative images of complement receptor expression in white pulp.** WT or Cr2 KO mouse spleens and sera were harvested from unimmunized mice (day 0) and from mice immunized with  $5 \times 10^7$  SRBC 1, 3, 6, or 14 days before and sections prepared as described in Materials and Methods. Representative merged and single channel images of SRBC immunized (naive (0), day 1-14) WT and Cr2 KO spleen where white pulp regions (surrounded by MOMA+ metallophilic macrophages, red), FDCs (FDC-M1, blue), CR1 (8C12, grey) and CR1/2 (8D9, green) are shown. Data shown is representative of 6-9 mice per group pooled from three independent experiment.
